# Supplementary material for: Manipulating three-dimensional gel network entanglement by thin film shearing
Source: Royal Society of Chemistry journal article supplement (doi:10.1039/c6cc00171h), 2016-01-01

## Supporting Information

1. Low q data fitting to Smearred Fractal Flexible Cylinder model for non-fluorinated bis-urea gelator

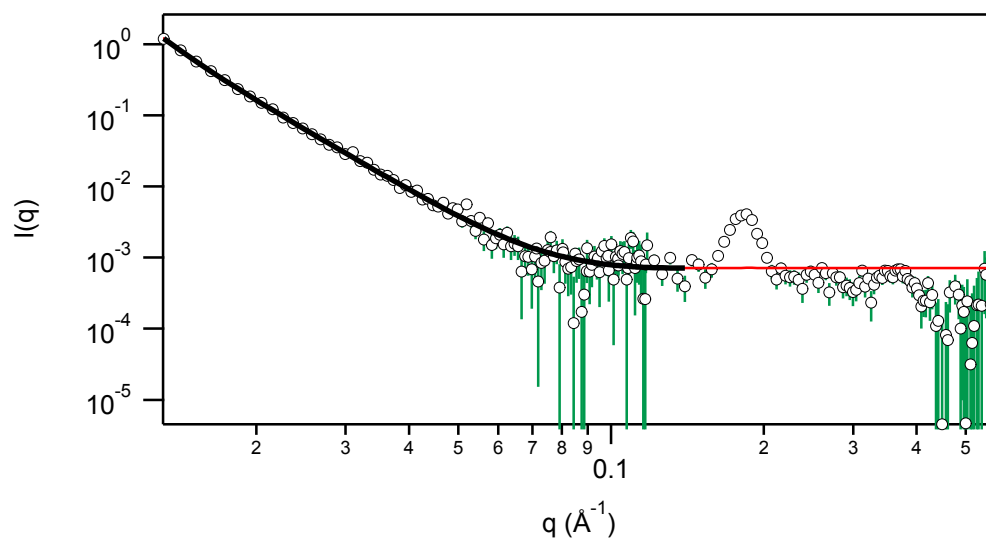

|                                           |             |
|-------------------------------------------|-------------|
| Volume Fraction (scale)                   | 9.16297e-06 |
| fractal dimension                         | 2.99369     |
| correlation length (Å)                    | 1650        |
| SLD block (Å <sup>-2</sup> )              | 9.82e-07    |
| SLD solvent (Å <sup>-2</sup> )            | 5.278e-06   |
| Contour Length (Å)                        | 10          |
| Kuhn Length, b (Å)                        | 10          |
| Cylinder Radius (Å)                       | 26.9943     |
| bkgd (cm <sup>-1</sup> sr <sup>-1</sup> ) | 0.000708908 |

chisq = 128.406

Npnts = 117

Sqrt( $\chi^2/N$ ) = 1.04761

Fitted range = [2,118] = 0.0131333 < Q < 0.139831

FitError = No Error

FitQuitReason = No Error

2. High q data: Gaussian Fitting for two peaks of non-fluorinated bis-urea gel showing peak ratio of 2:1 (lamellar structure)

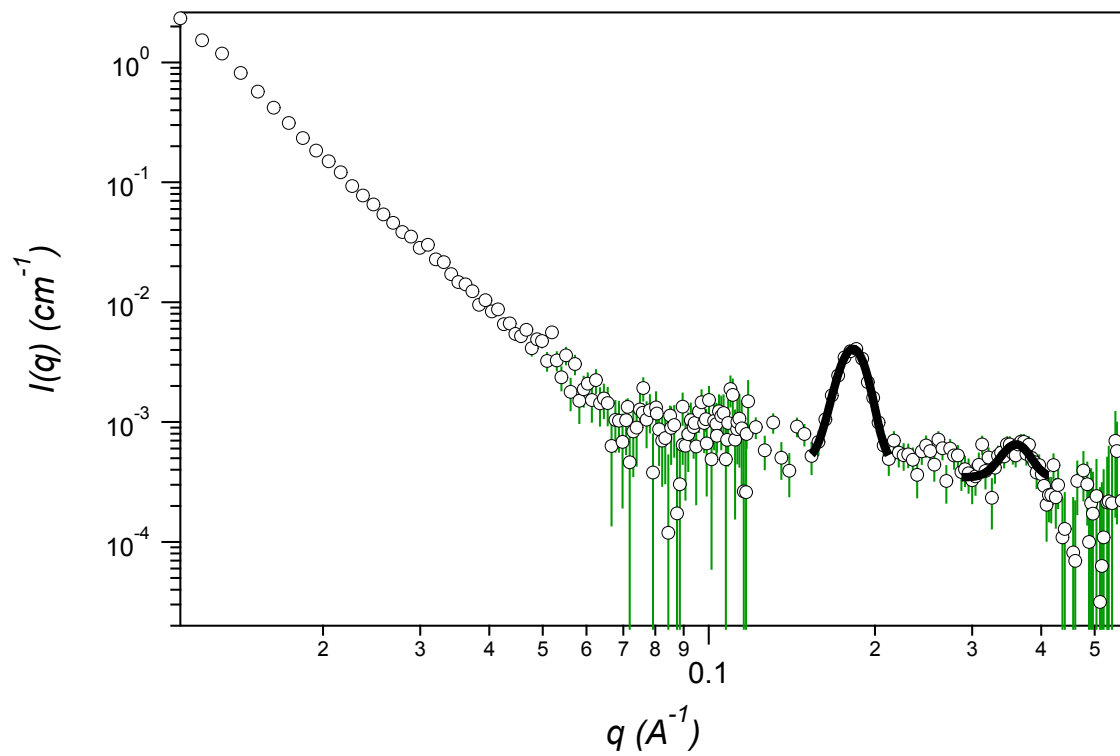

Supplement: c6cc00171h1.pdf [file c6cc00171h1.pdf]
